# Supplementary material for: Media en Slachtofferhypothese - een onderzoek naar de berichtgeving ten tijde van de missie in Uruzgan
Source: Oxford University Press journal article supplement (doi:10.1042/bsr20200259), 2012-09-06
Supplement: bsr-2020-0259_supp.pdf [file bsr-2020-0259_supp.pdf]

**Supplementary Table 1. Primers for quantitative real-time PCR detection.**

| Gene        | Sequence                      |
|-------------|-------------------------------|
| Lc3-FWD     | 5'-CGGCTTCCTGTACATGGTTT-3'    |
| Lc3-REV     | 5'-AACCAT TGGCTTTGTTGGAG-3'   |
| NF-kB-FWD   | 5'-GTGCTCGGTGGGAGTAAGAG-3'    |
| NF-kB-REV   | 5'-CTCCCGTCACTGCATAGTCA-3'    |
| miR-145-FWD | 5'-CAGTGCGTGTTCGTGGAGT-3'     |
| miR-145-REV | 5'-AGGTCCAGTTTTCCAGG-3'       |
| IL18-FWD    | 5'-CAGGCCTGACATCTTCTGCAA-3'   |
| IL18-REV    | 5'-CTGACATGGCAGCCATTGT-3'     |
| IL-1b-FWD   | 5'-AAGCCTCTCCACCTCCTCTC-3'    |
| IL-1b-REV   | 5'-TTGTCCCTGATACCCAAGG-3'     |
| GSDMD-FWD   | 5'-ATATCTGCCAGAGATTGATA-3'    |
| GSDMD-REV   | 5'-TGGAAGTATCTTTGCCGGT-3'     |
| Actin-FWD   | 5'-TGGACTTCGAGCAGGAAATGG-3'   |
| Actin-REV   | 5'-ACGTCGCAC TTCATGATCGAG-3'  |
| U6-FWD      | 5'-ATTGGAACGATACAGAGAAGATT-3' |
| U6-REV      | 5'-GGAACGCTTCACGAATTTG-3'     |
